# Supplementary material for: Microbiota restoration reduces antibiotic-resistant bacteria gut colonization in patients with recurrent Clostridioides difficile infection from the open-label PUNCH CD study
Source: PubMed Central journal article supplement (PMC7888090; doi:10.1186/s13073-021-00843-9), 2021-02-16

# Fig. S1

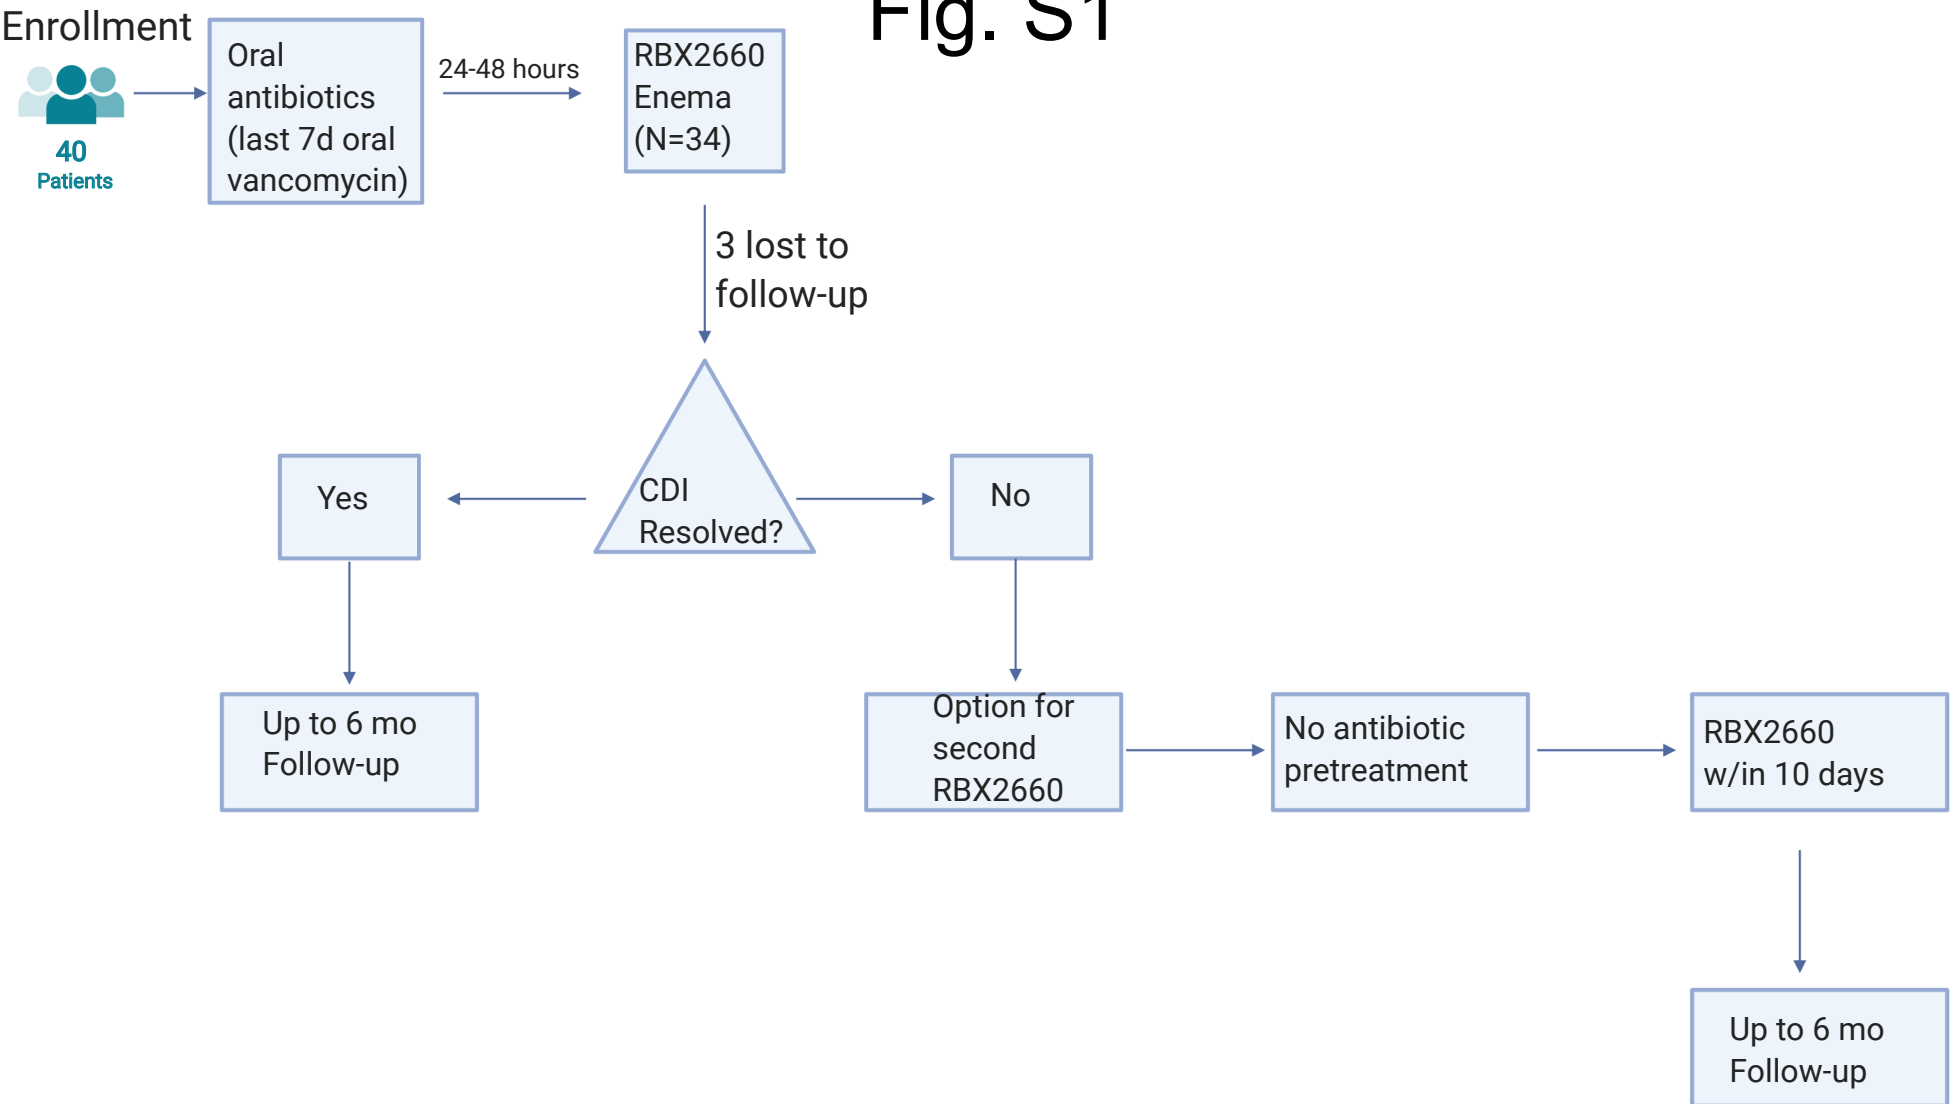

# Fig. S2

## A

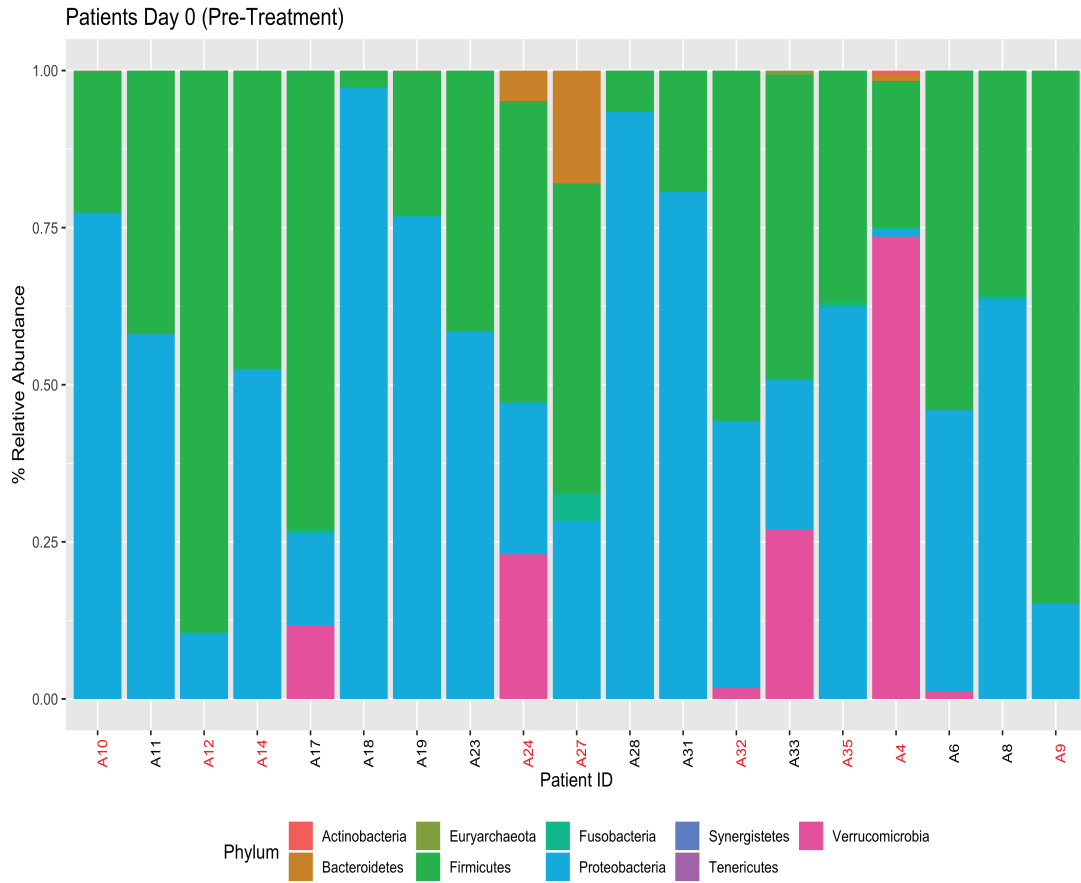

## B

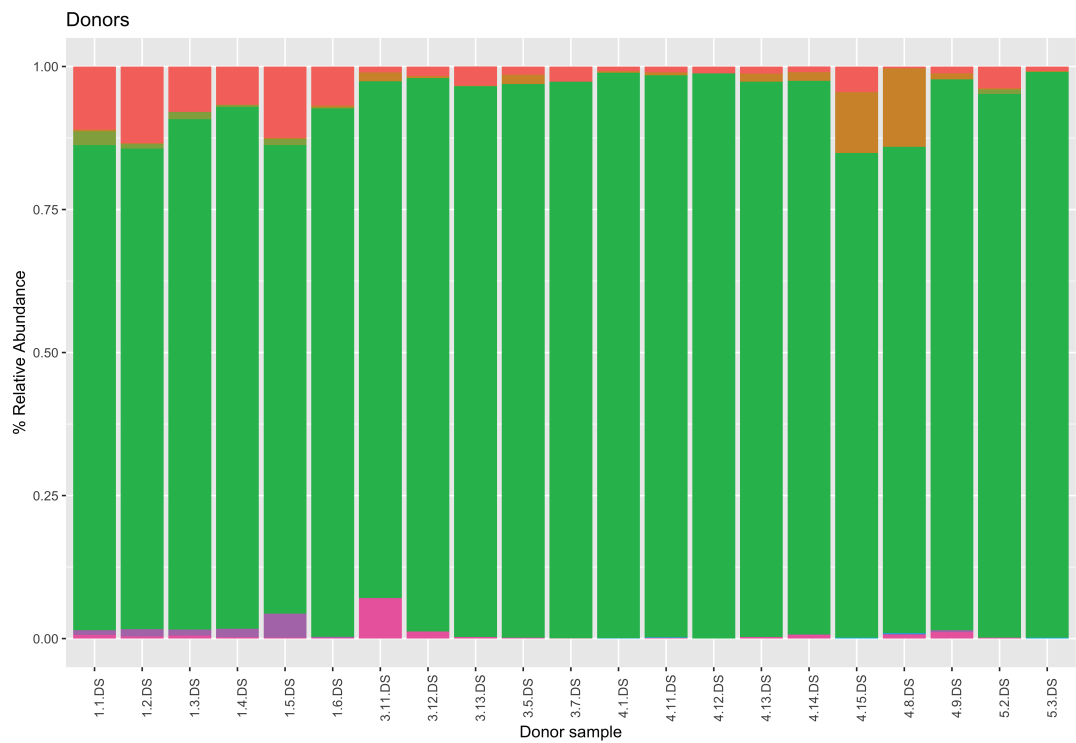

Fig. S3

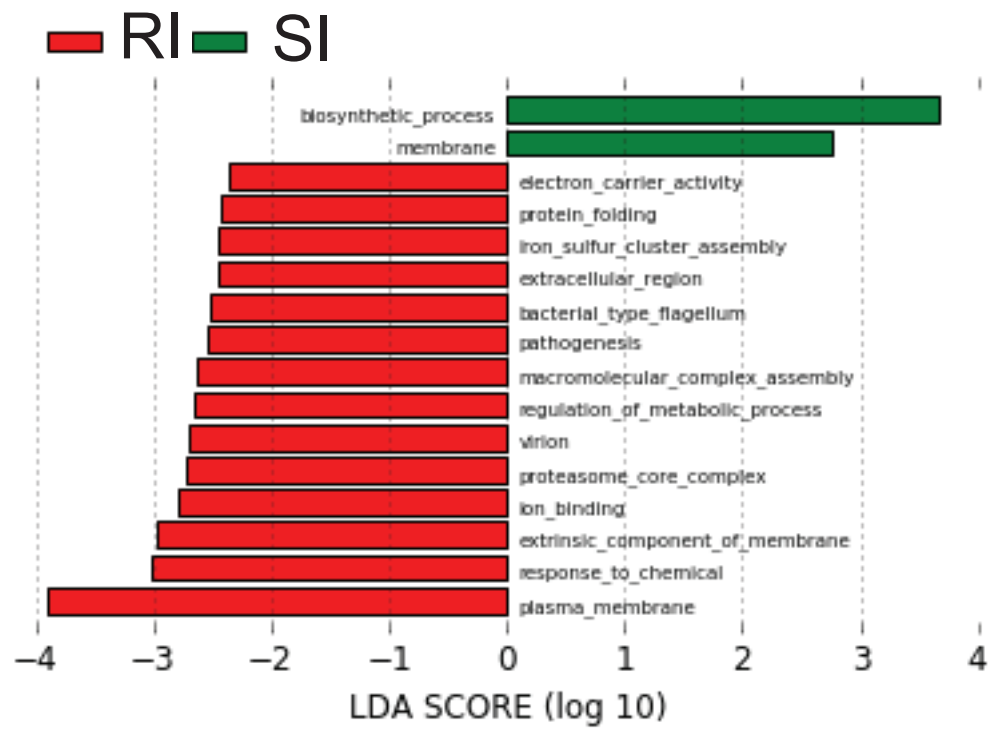

# Fig. S4

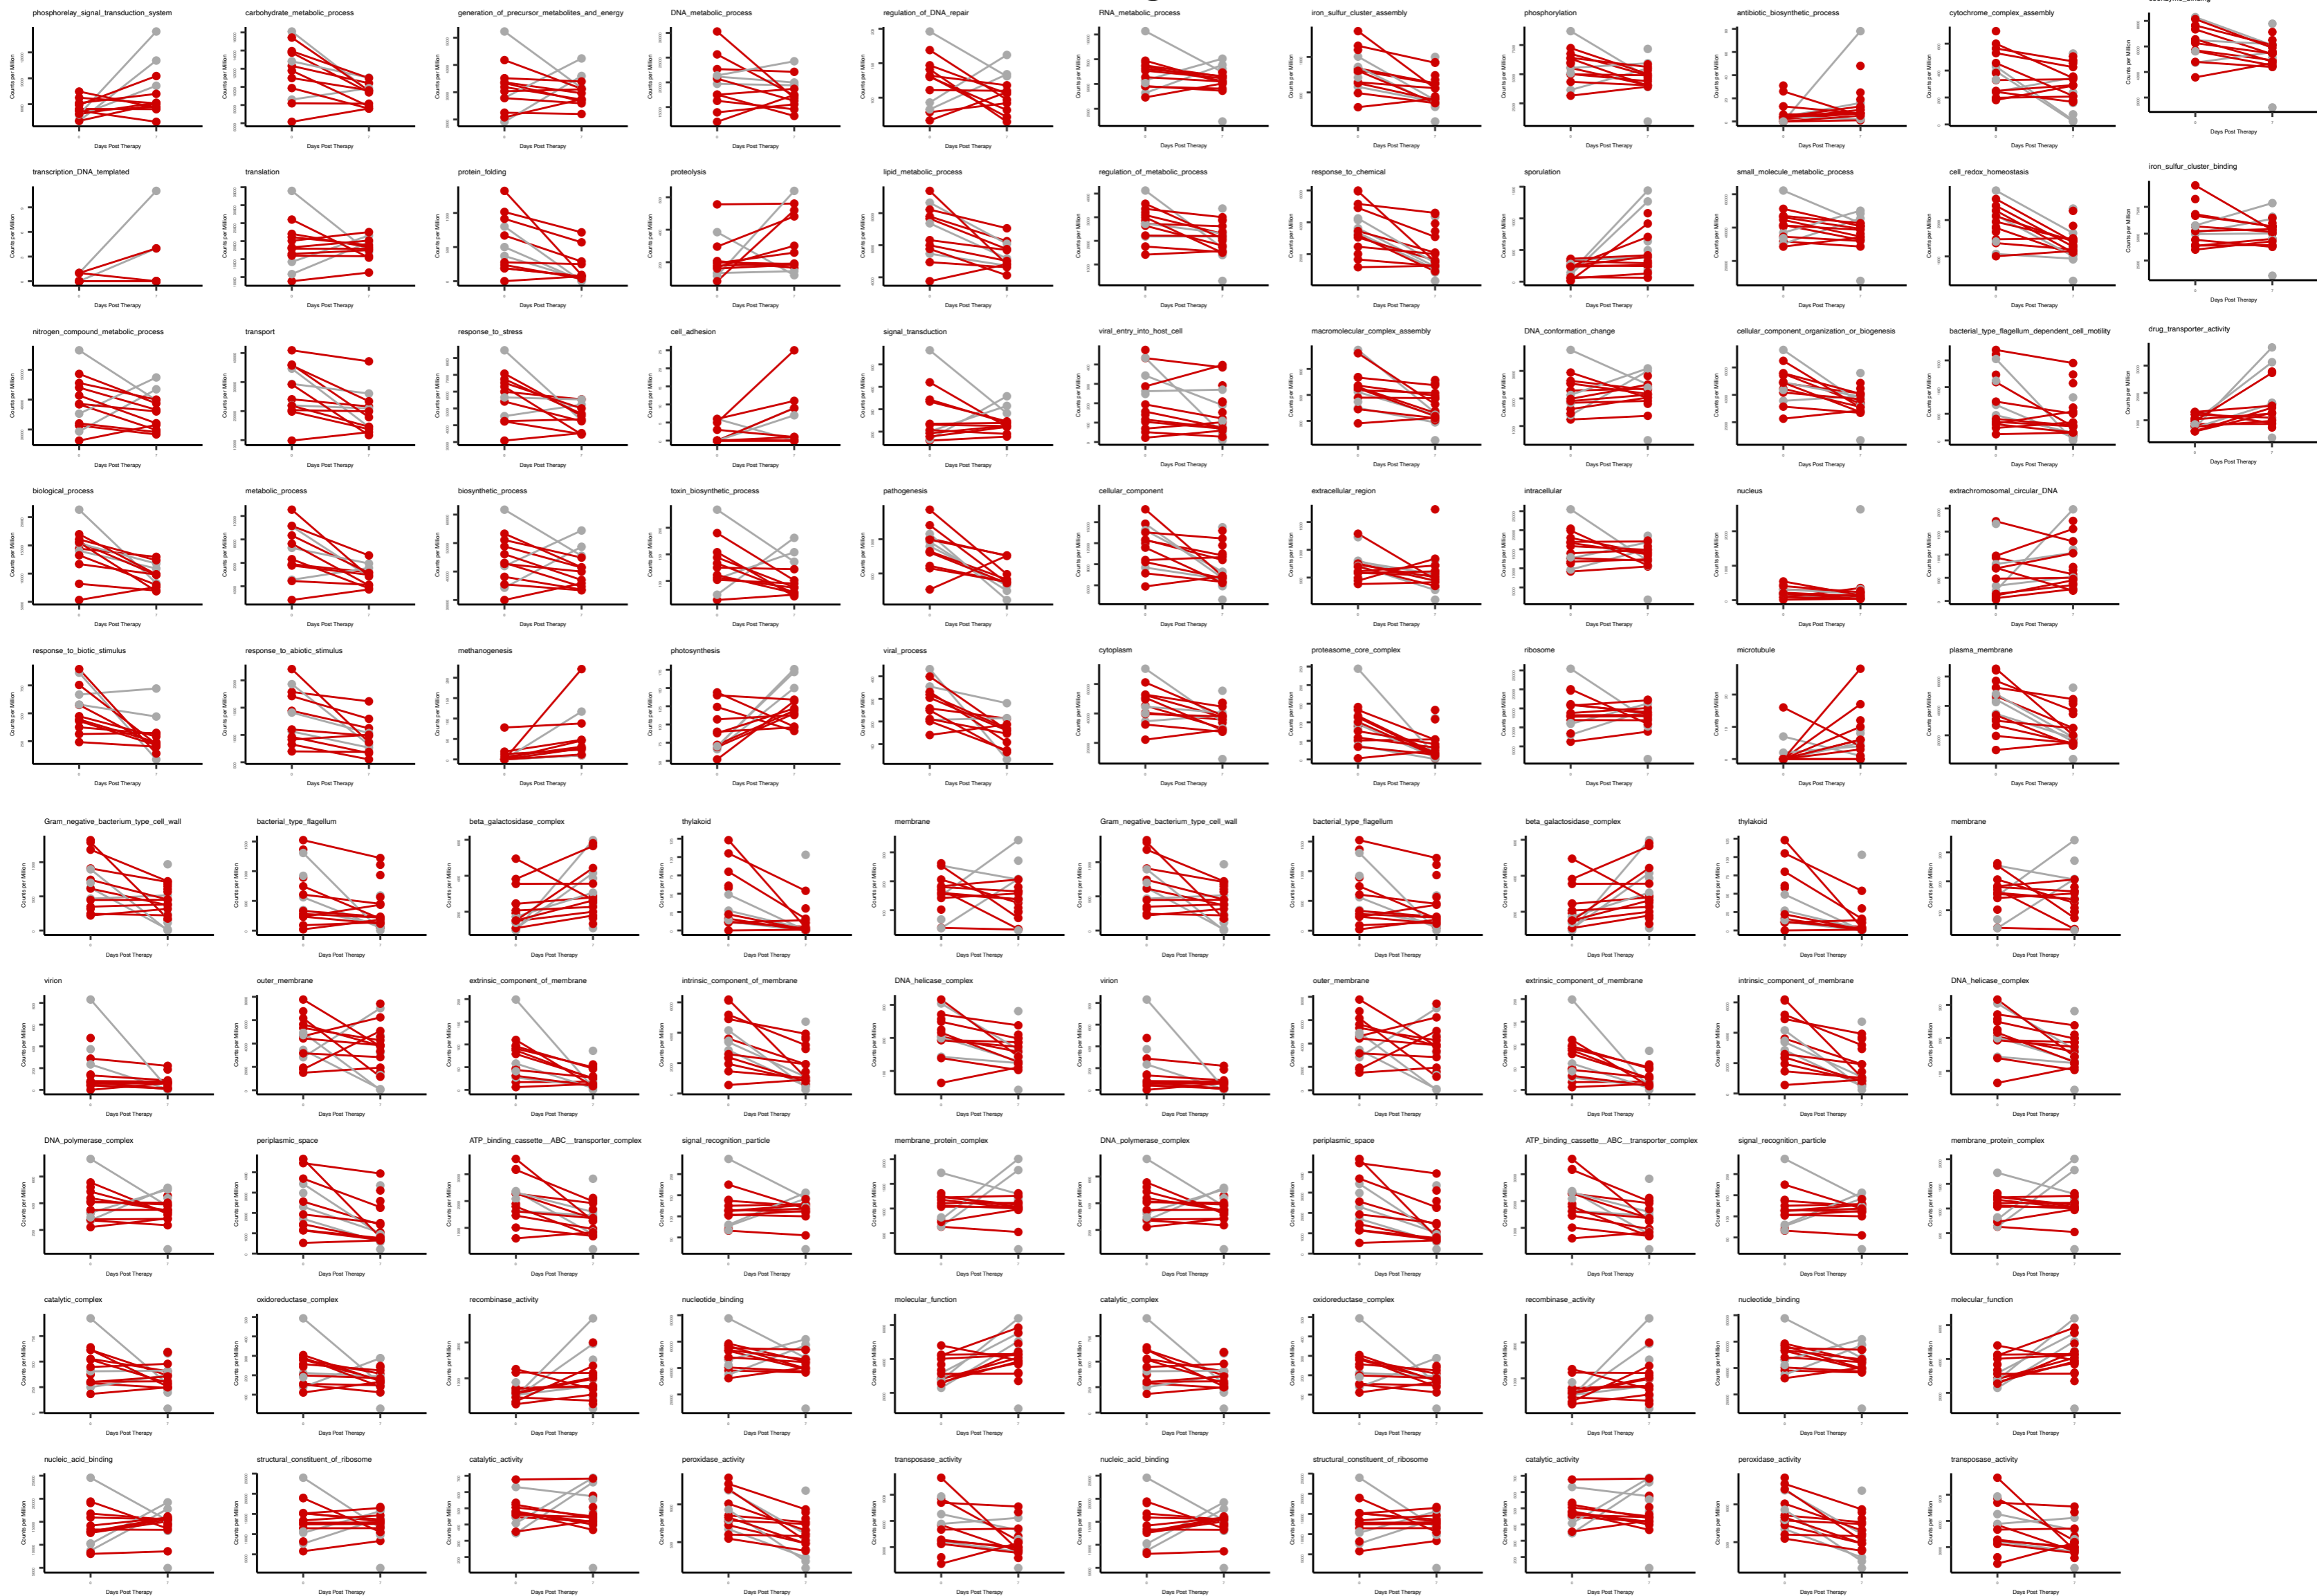

# Fig. S5

## A

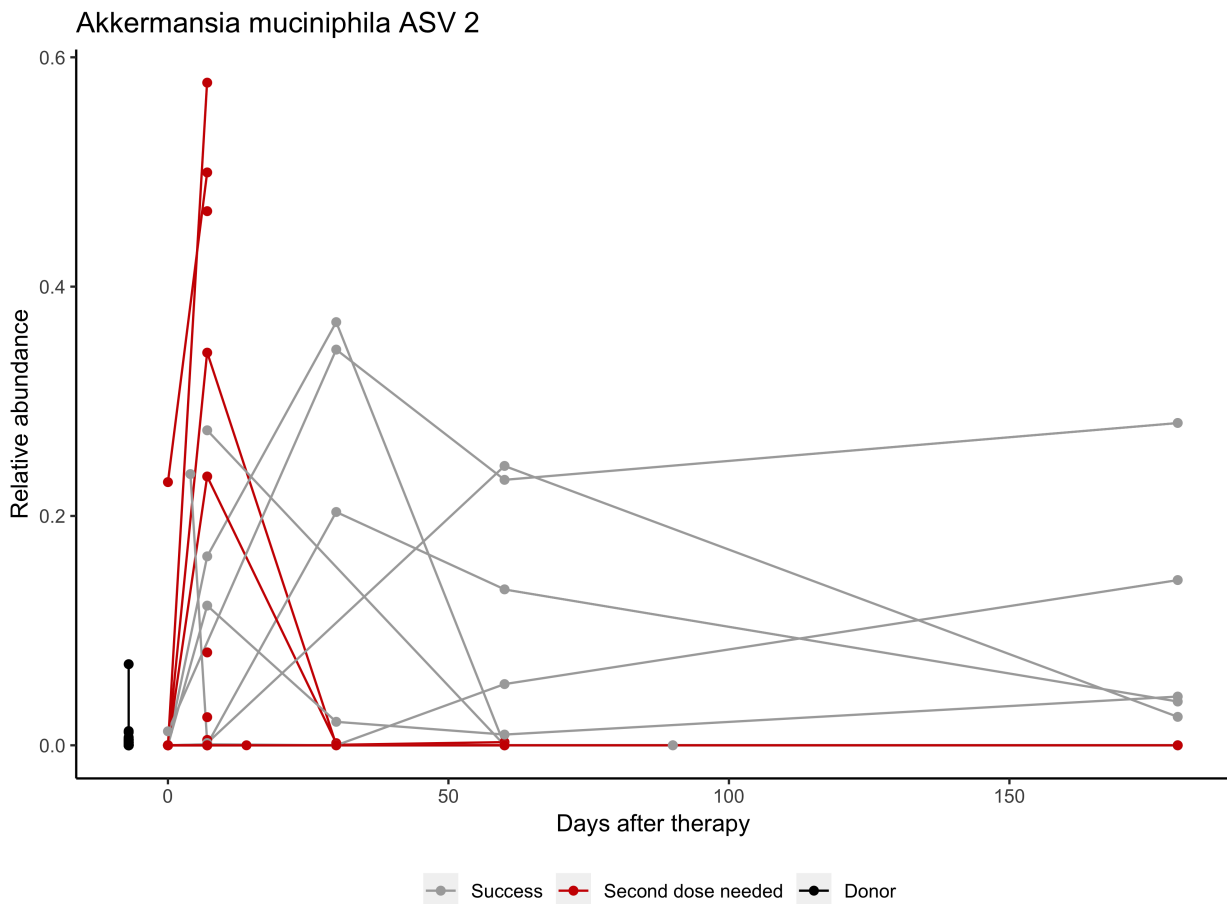

## B

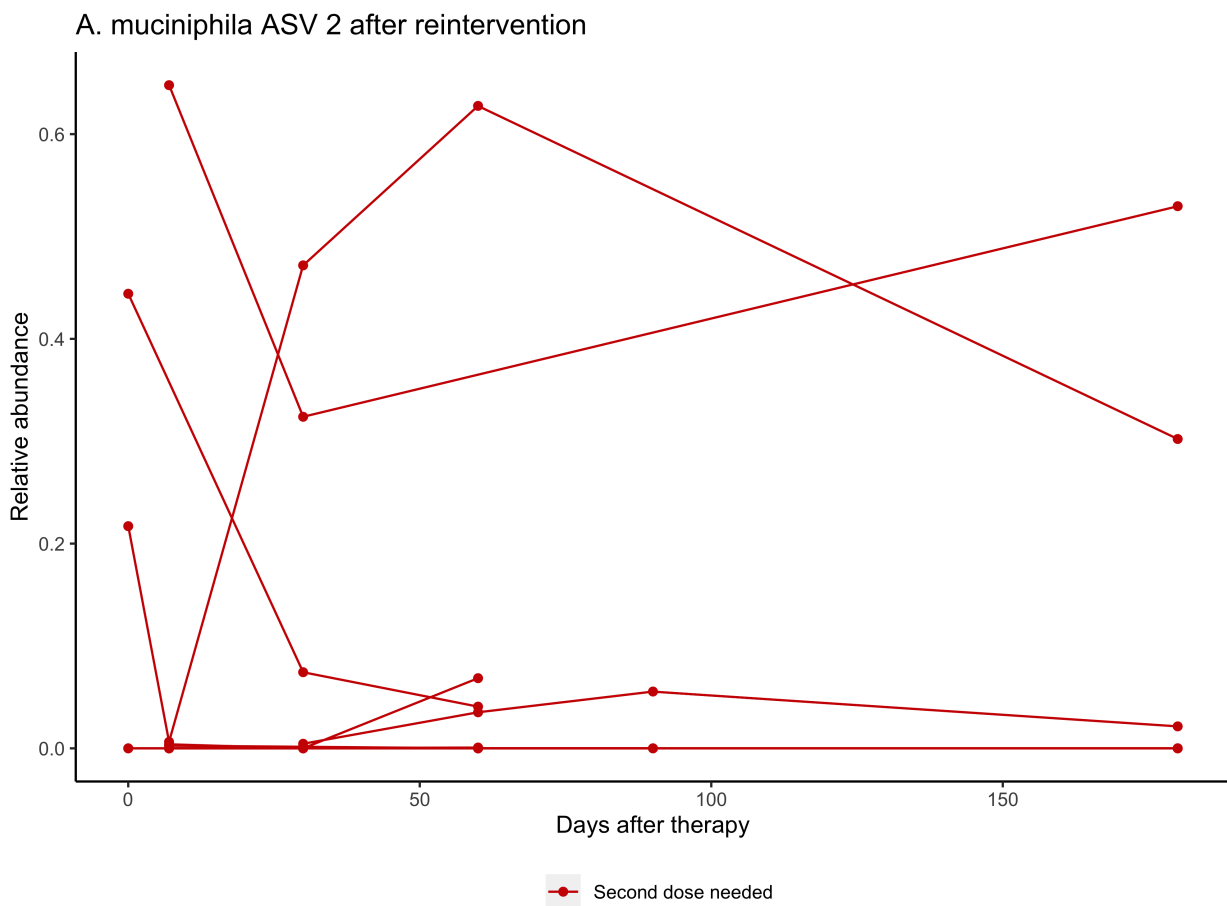

Fig. S6

A

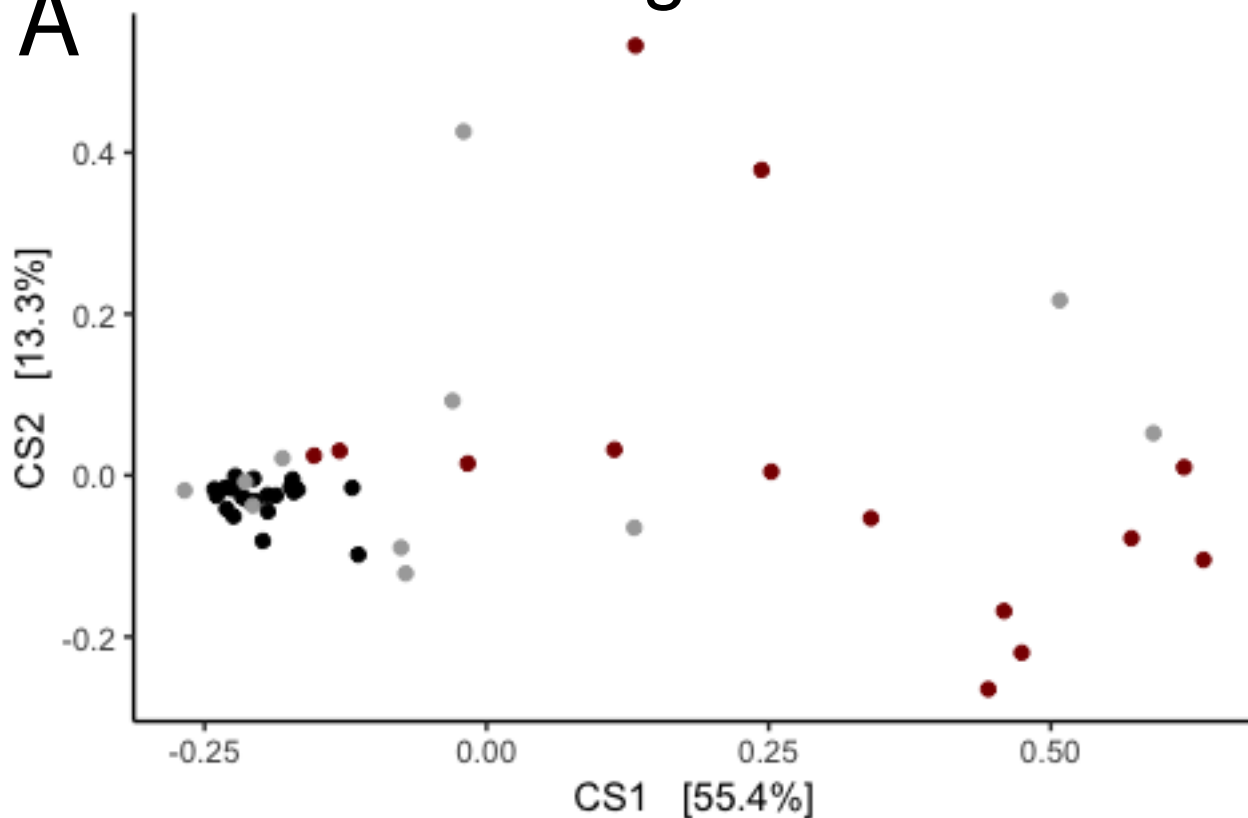

B

Success after initial therapy ● SI ● RI ● Donor

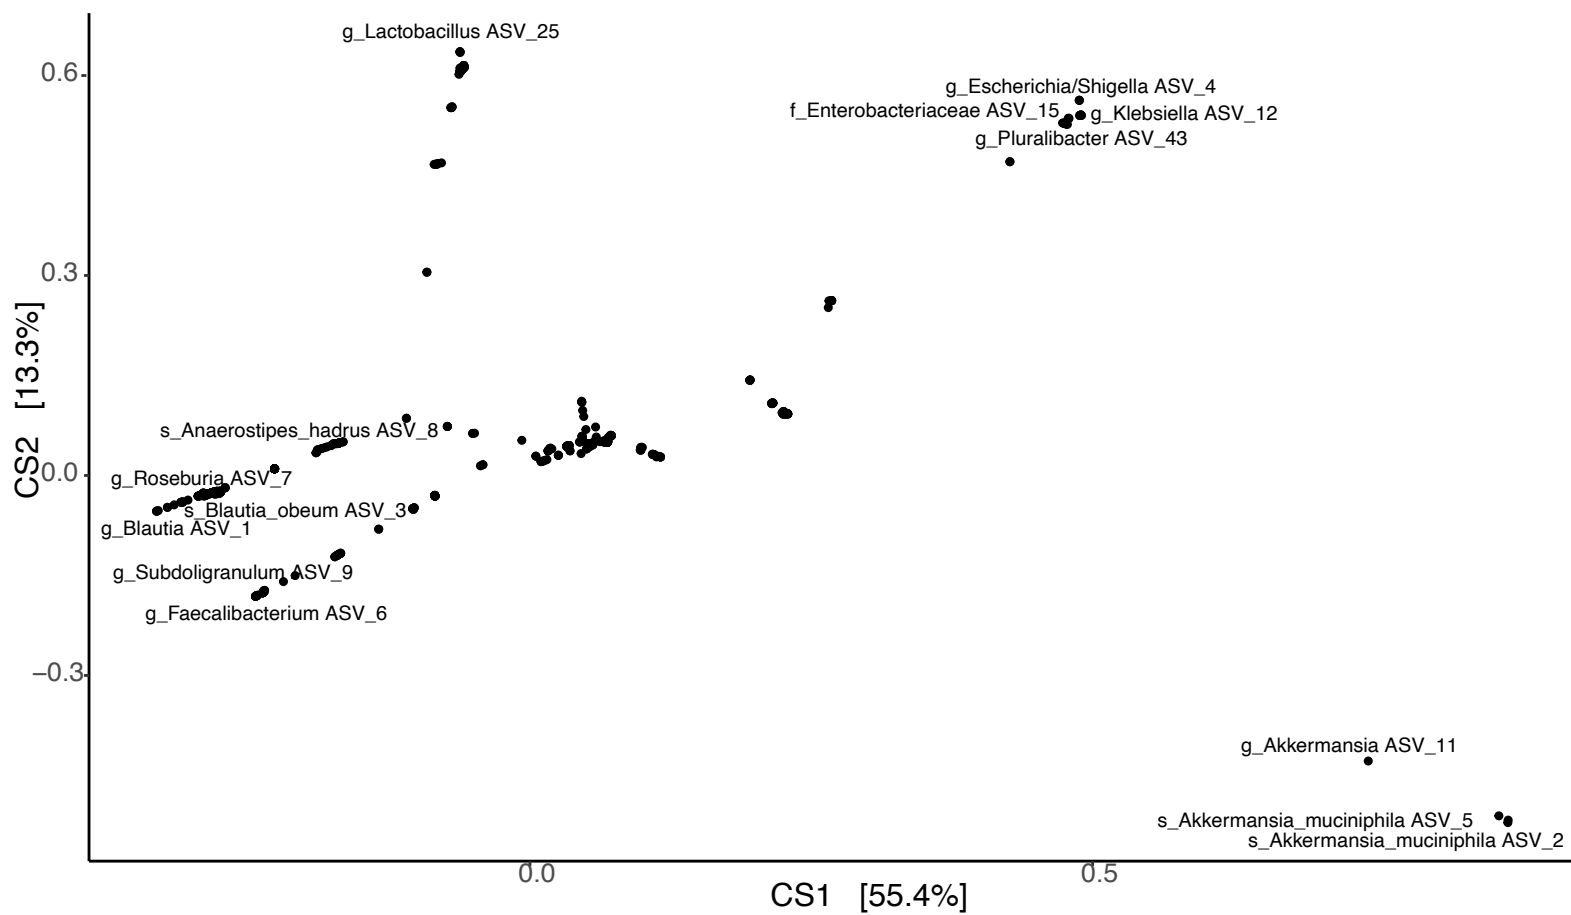

# Fig. S7

## A

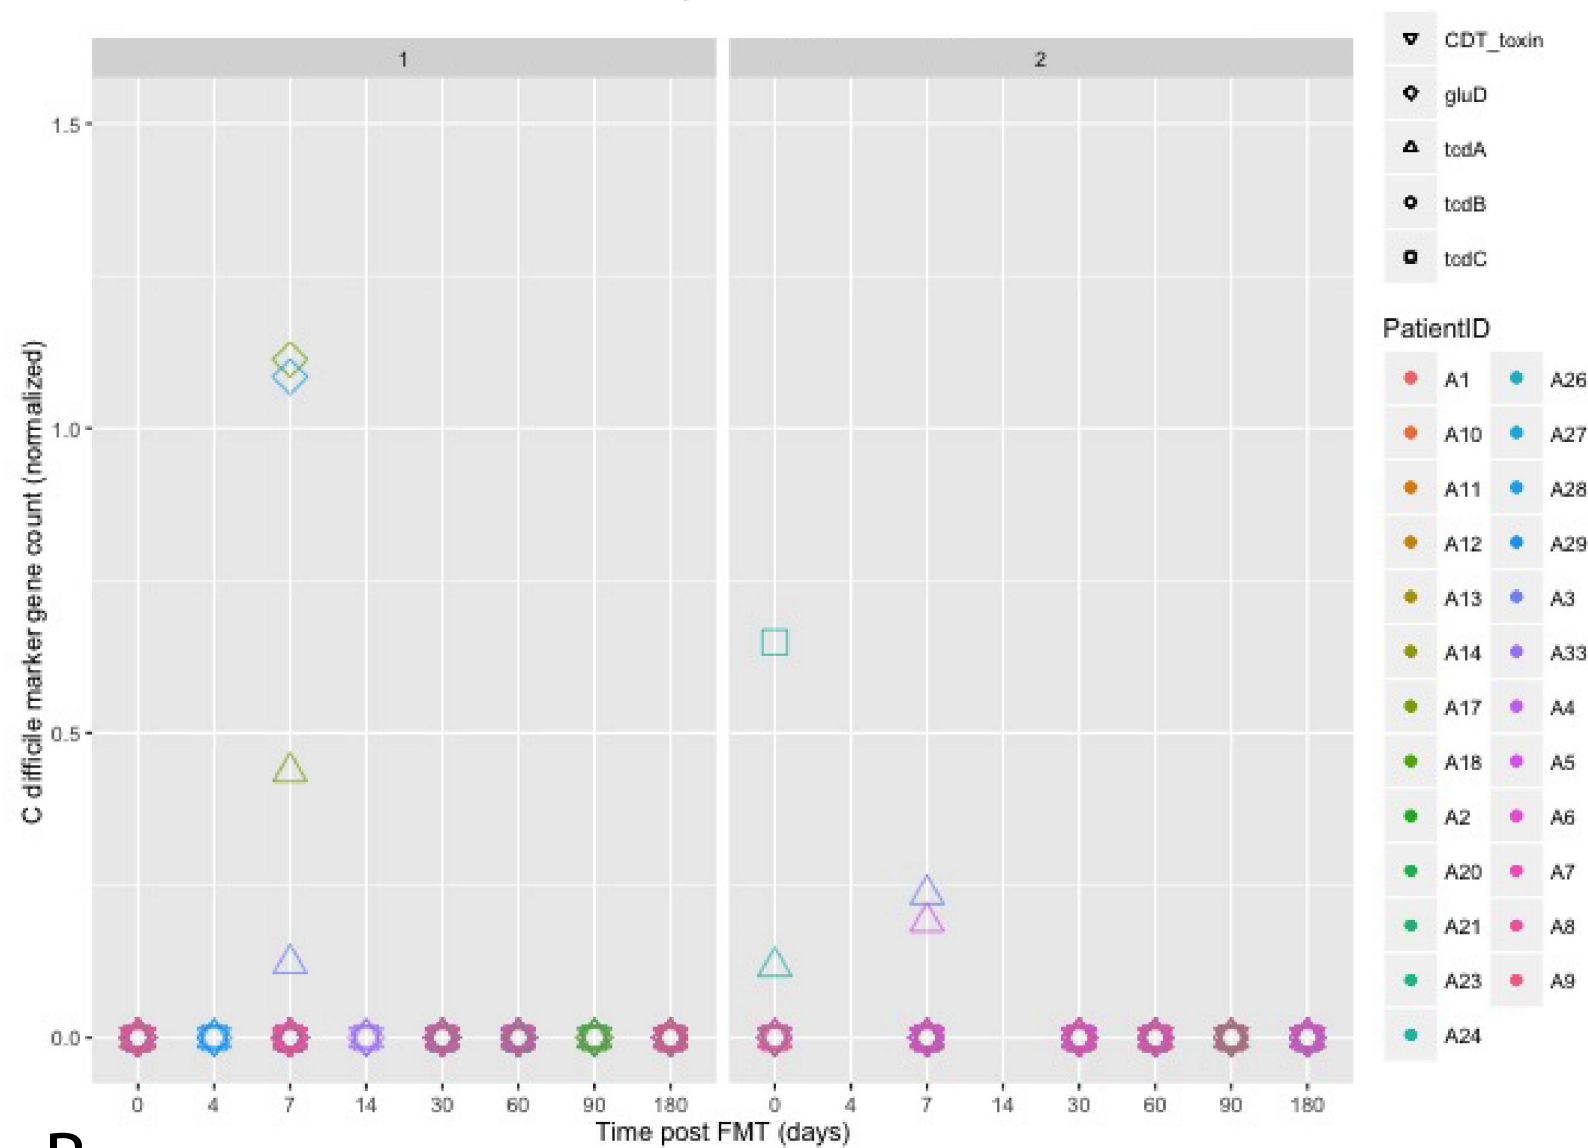

## B

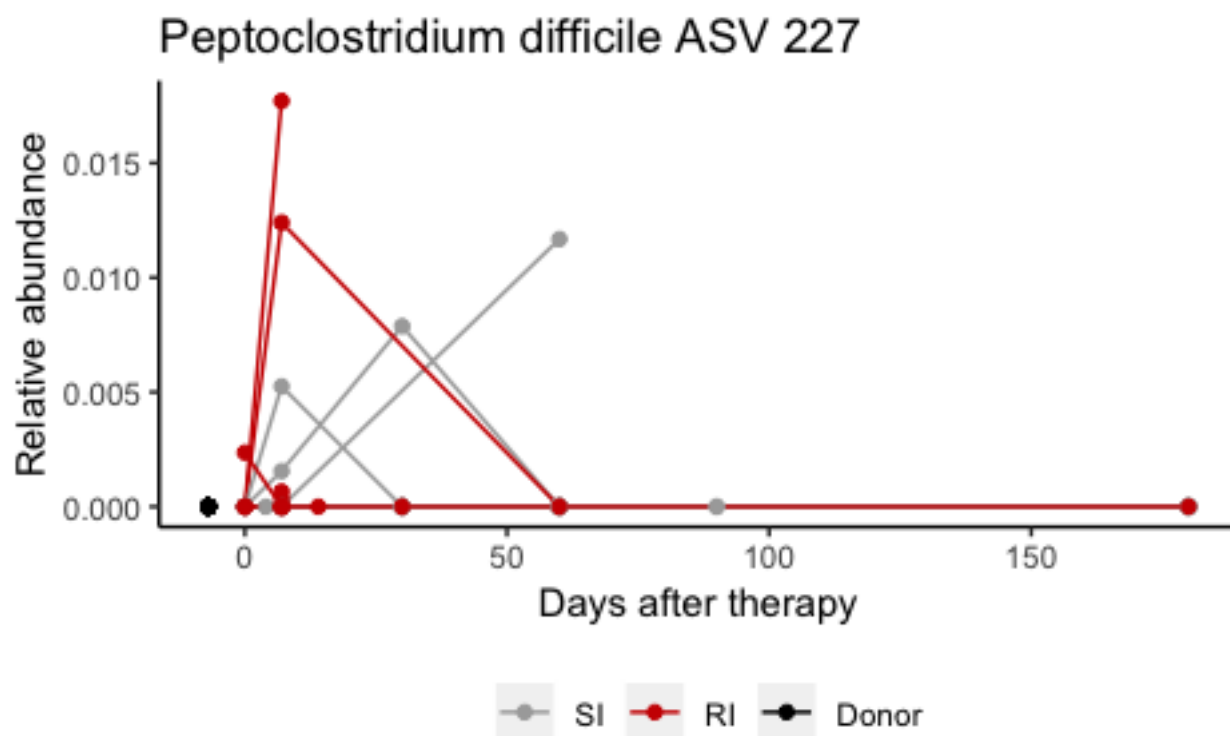

Supplement: 13073_2021_843_MOESM1_ESM.pdf [file 13073_2021_843_MOESM1_ESM.pdf]
