# Supplementary material for: Microbiota restoration reduces antibiotic-resistant bacteria gut colonization in patients with recurrent Clostridioides difficile infection from the open-label PUNCH CD study
Source: PubMed Central journal article supplement (PMC7888090; doi:10.1186/s13073-021-00843-9), 2021-02-16

# Fig. S8

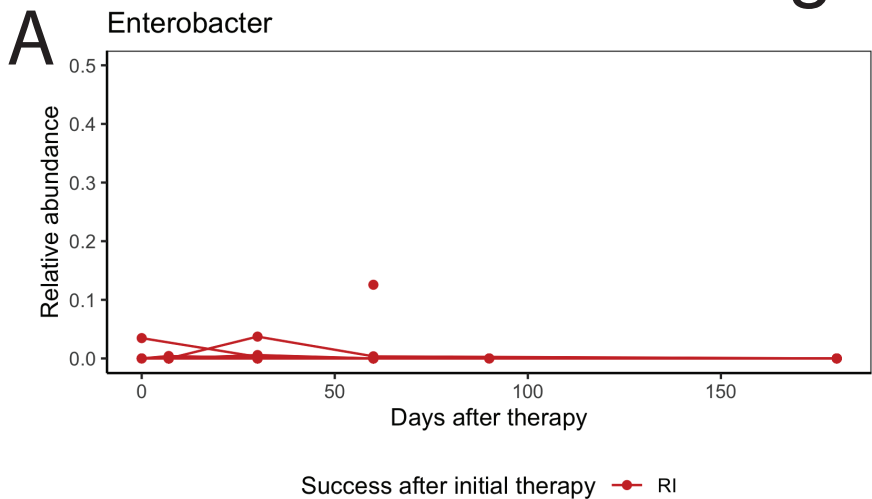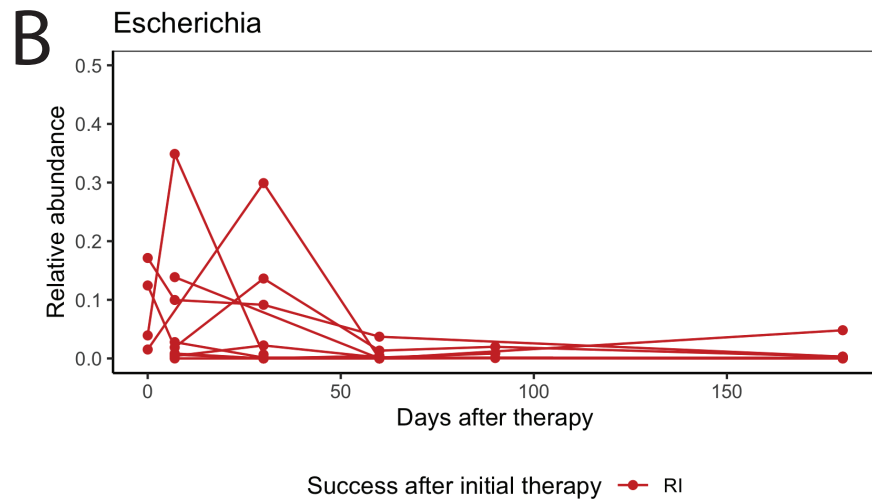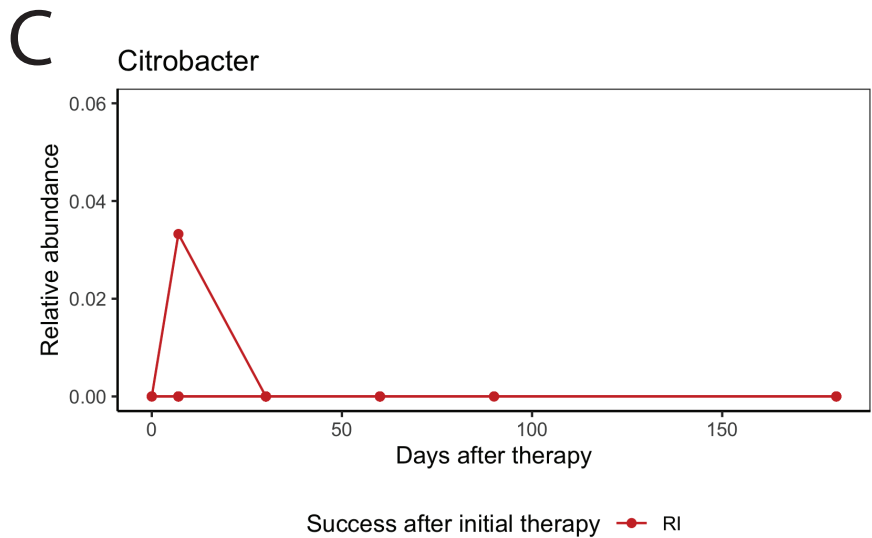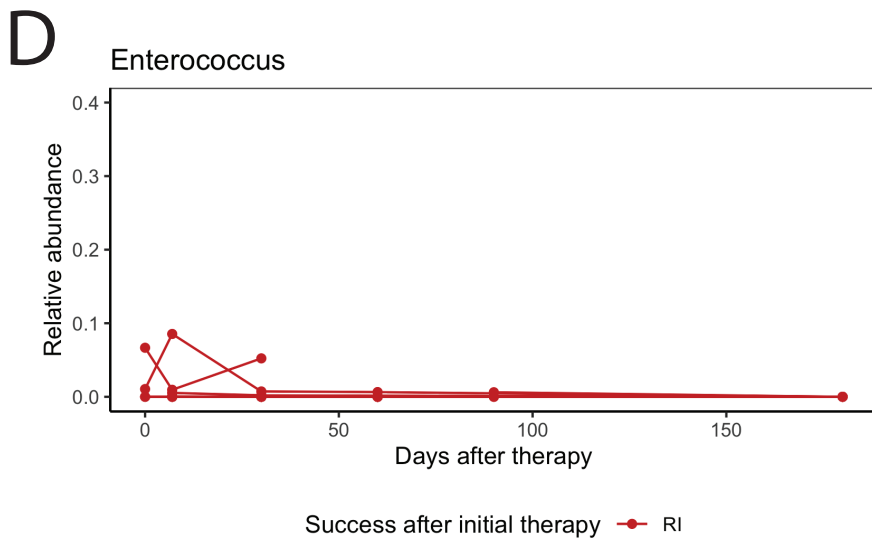

# Fig. S9

## A RI Group; FMT 1

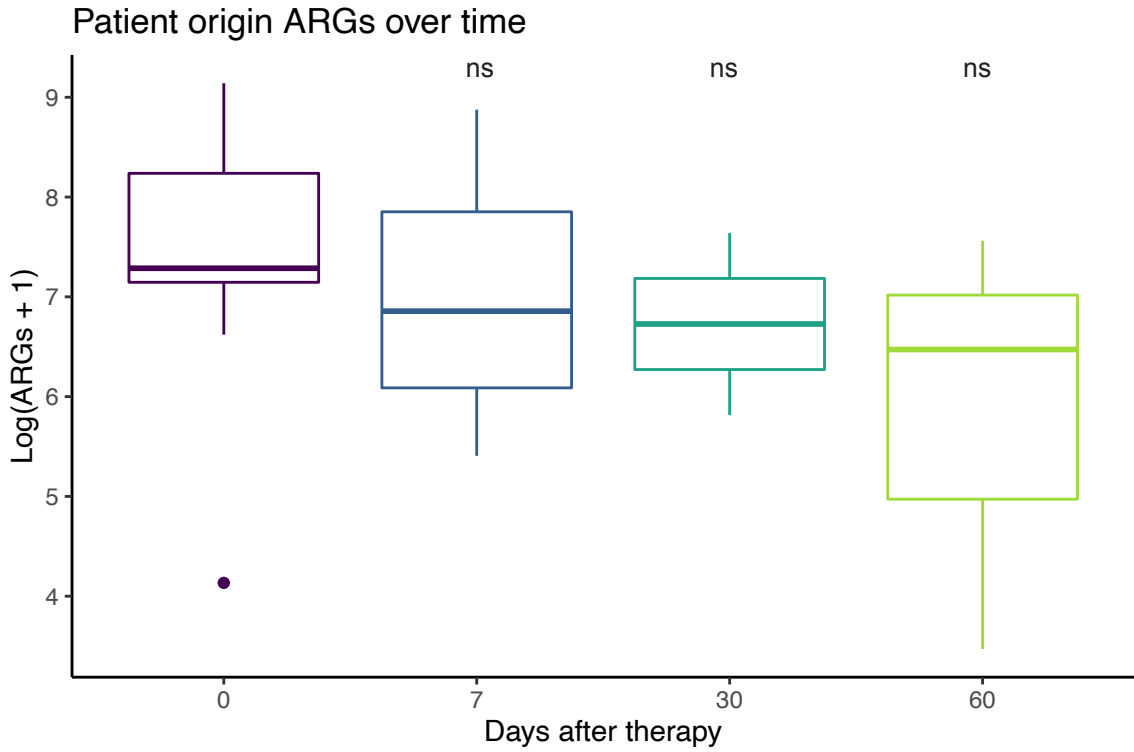

## B RI Group; FMT 2

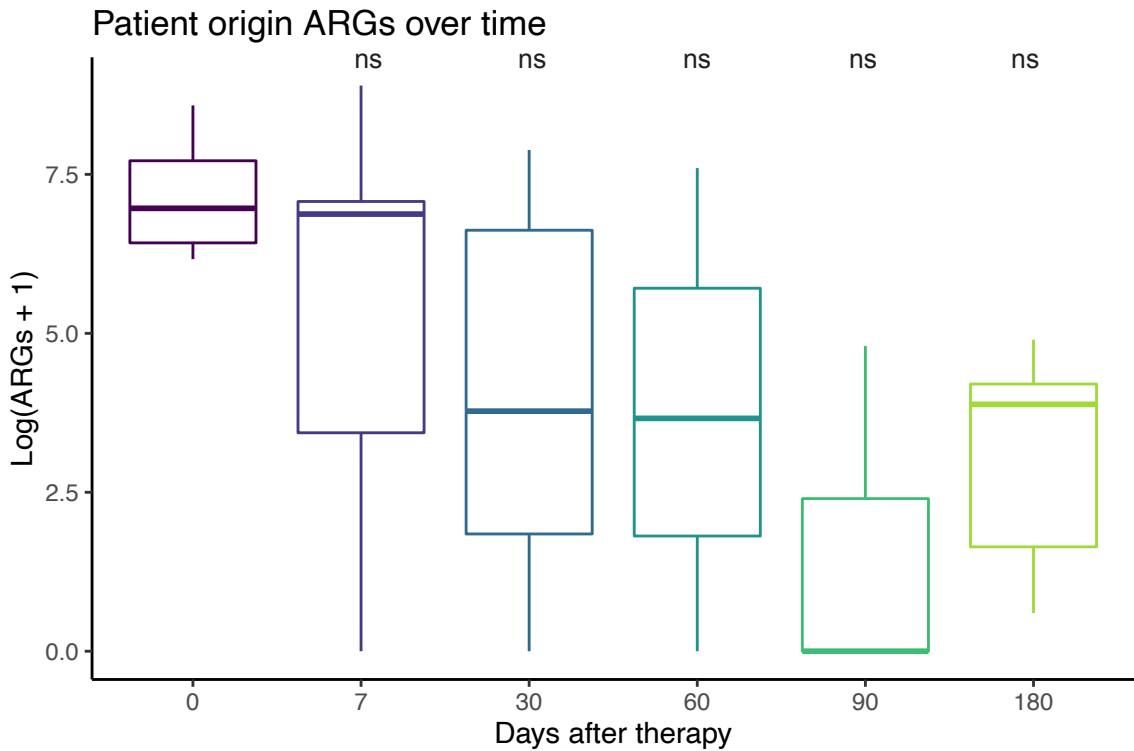

# Fig. S10

ARGs not present in patients Day 0 or in their donor

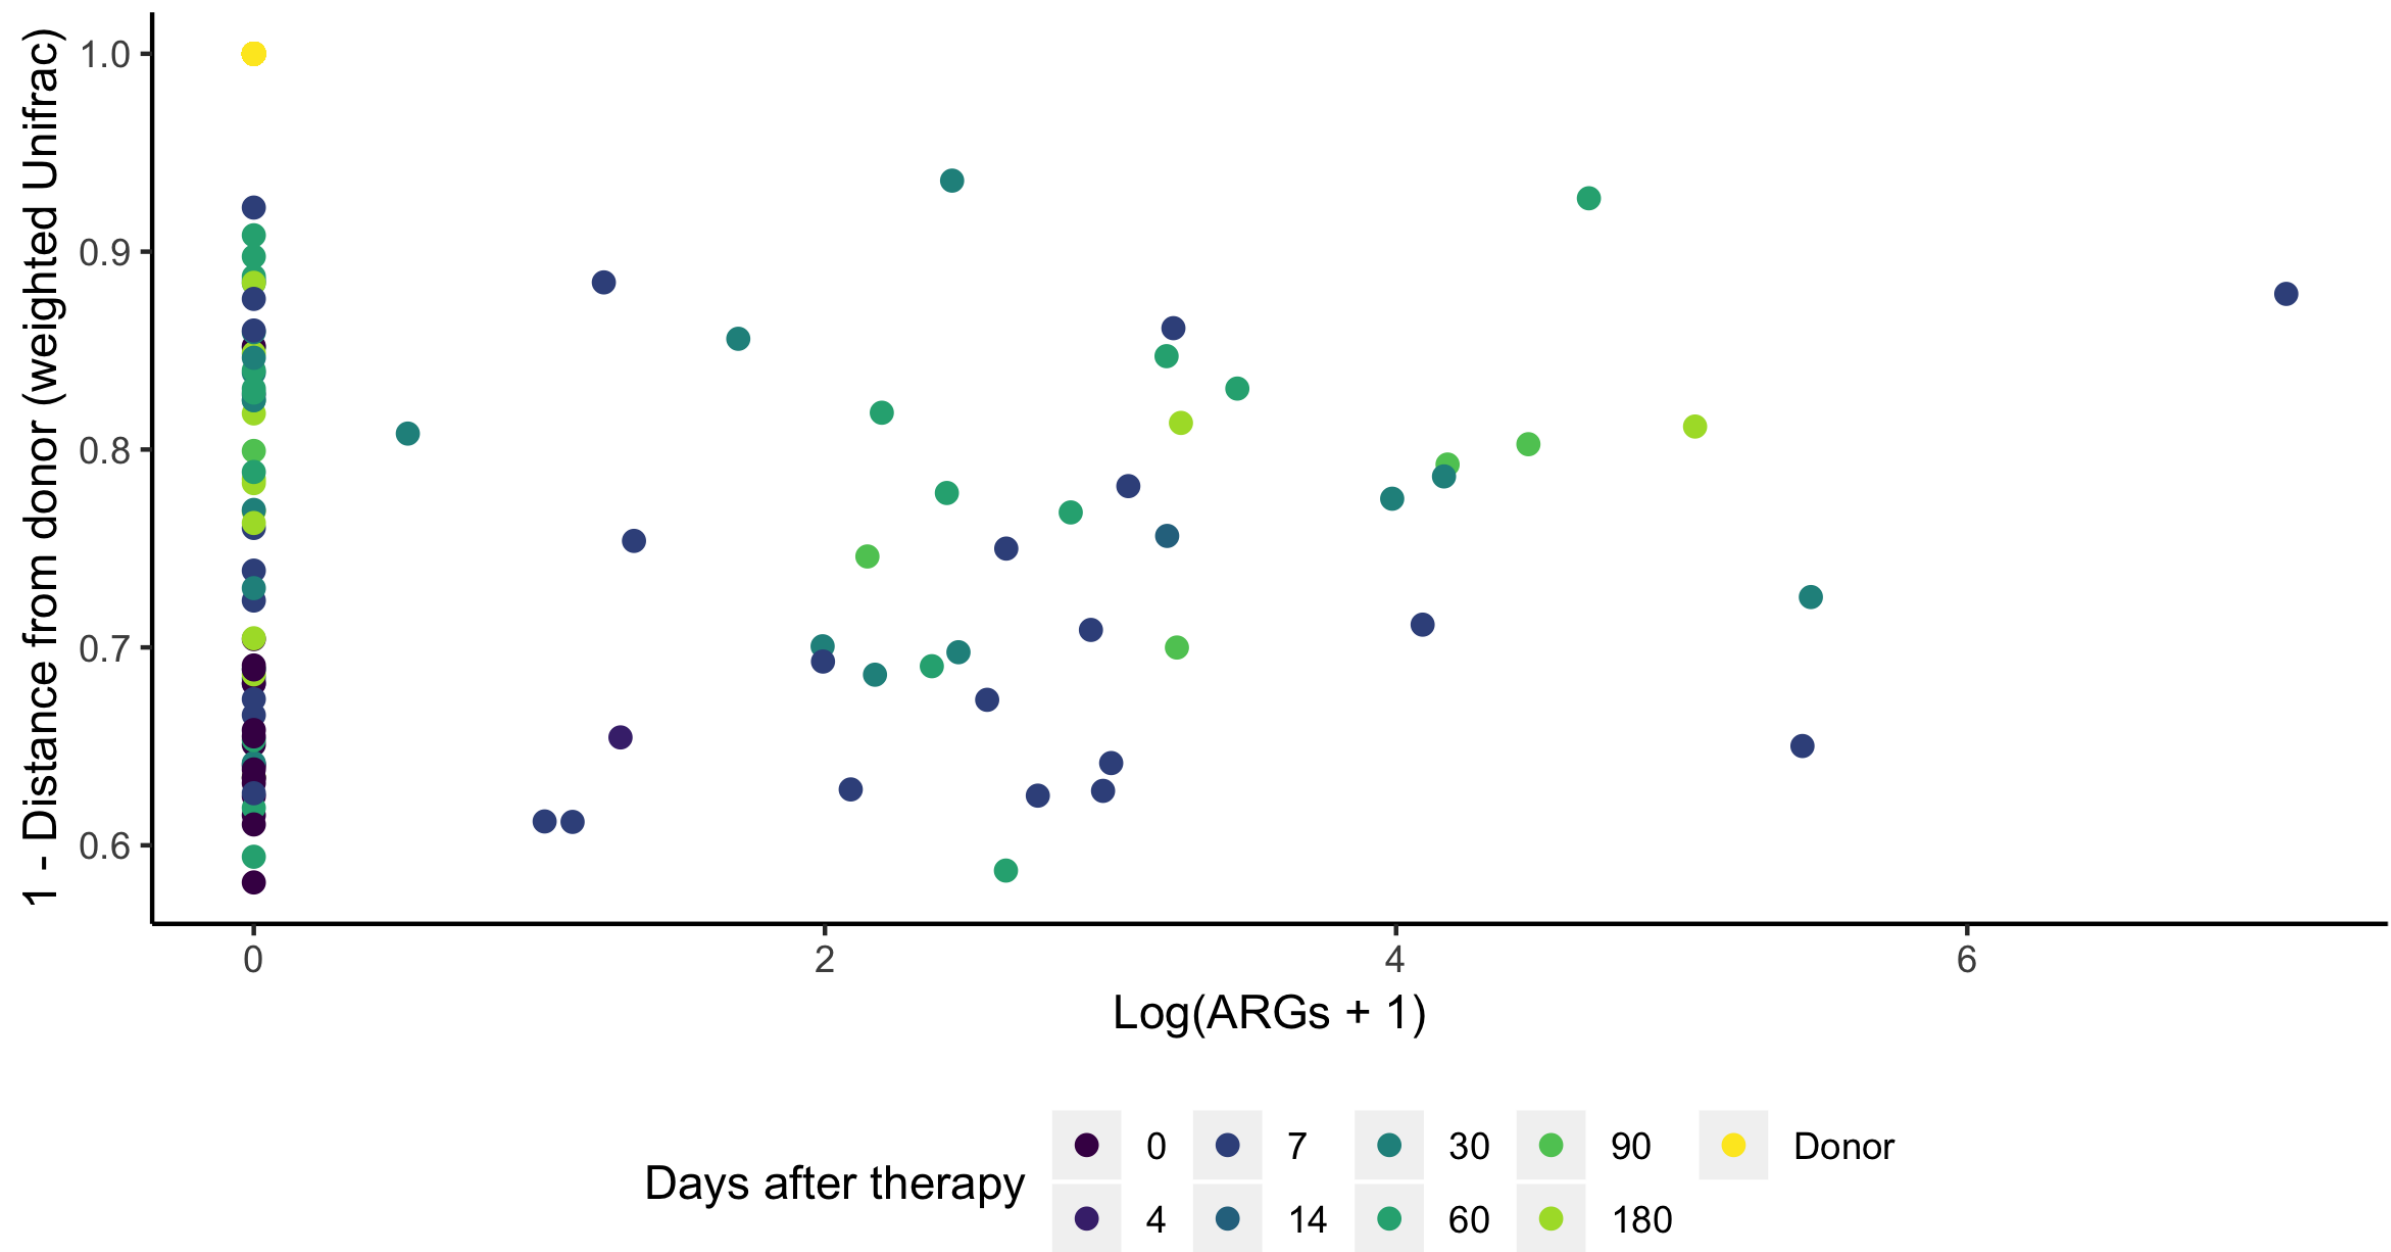

Supplement: 13073_2021_843_MOESM5_ESM.pdf [file 13073_2021_843_MOESM5_ESM.pdf]
